# Supplementary material
Source: PubMed Central journal article supplement (PMC2681389)

Supplementary Figure 1, Body weights and composition of wild-type and mutant lamin A and lamin C mice on high-fat diet.

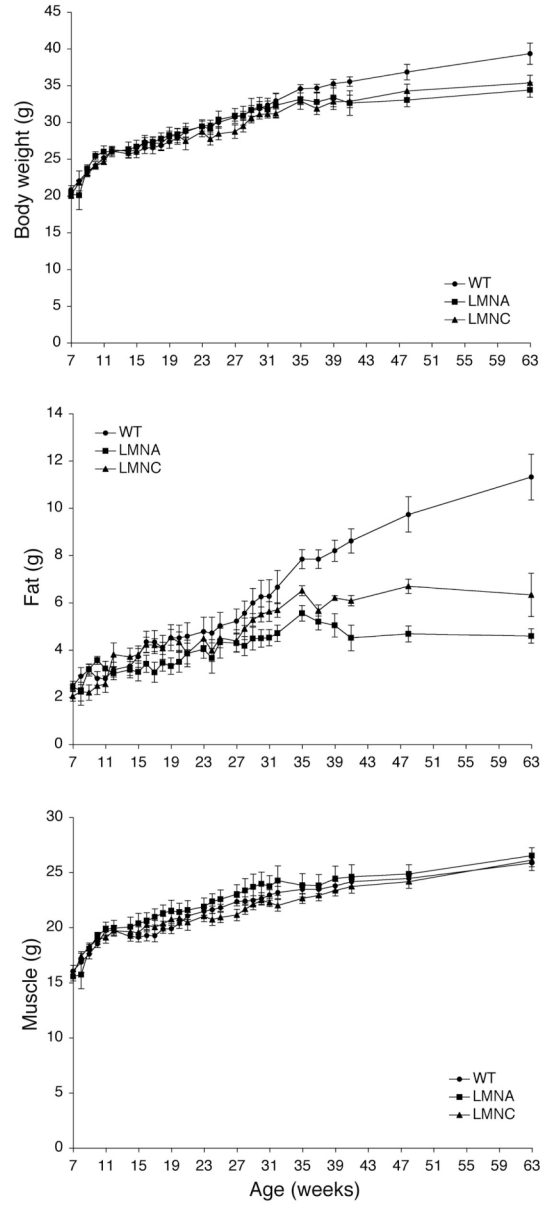

Supplementary Figure 2. Body Weights and composition of wild-type and mutant lamin A mice on chow diet.

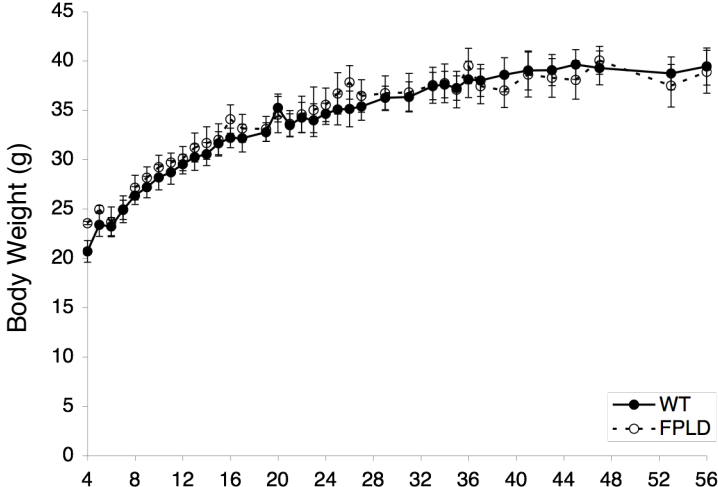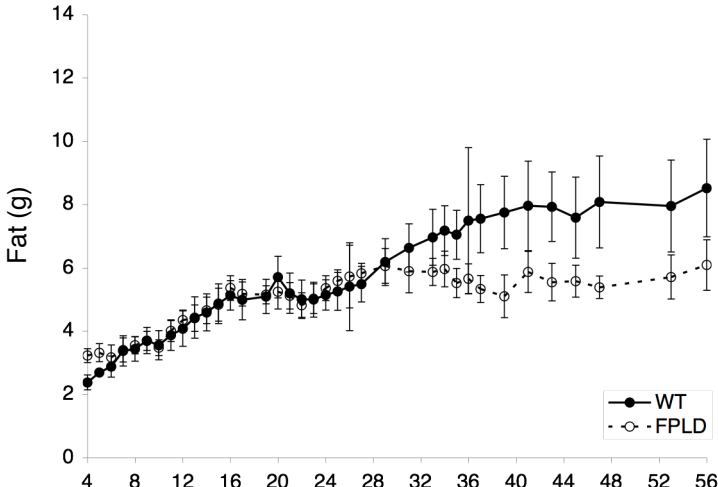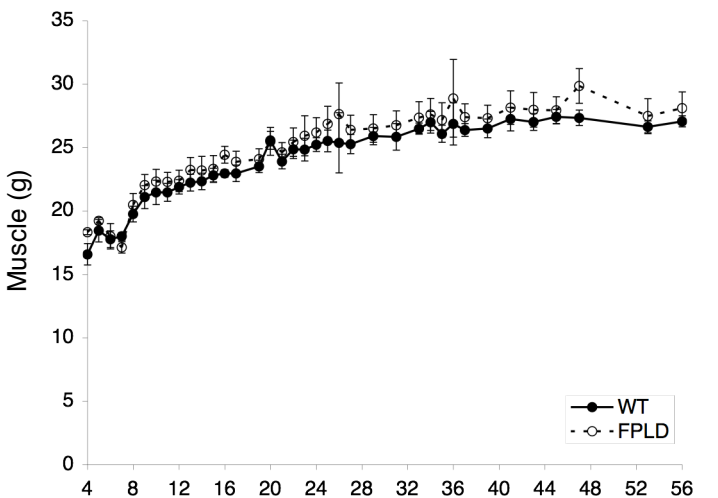

Supplement: supp_M800491-JLR200_SupplFigures.pdf [file supp_M800491-JLR200_SupplFigures.pdf]
